# Supplementary figures and images for: Cognitive spectroscopy for wood species identification: near infrared hyperspectral imaging combined with convolutional neural networks
Source: Royal Society of Chemistry journal article supplement (doi:10.1039/c9an01180c), 2019-01-01

**a) PC4-PC6 SNV patches (R: PC4, G: PC5, B: PC6)**

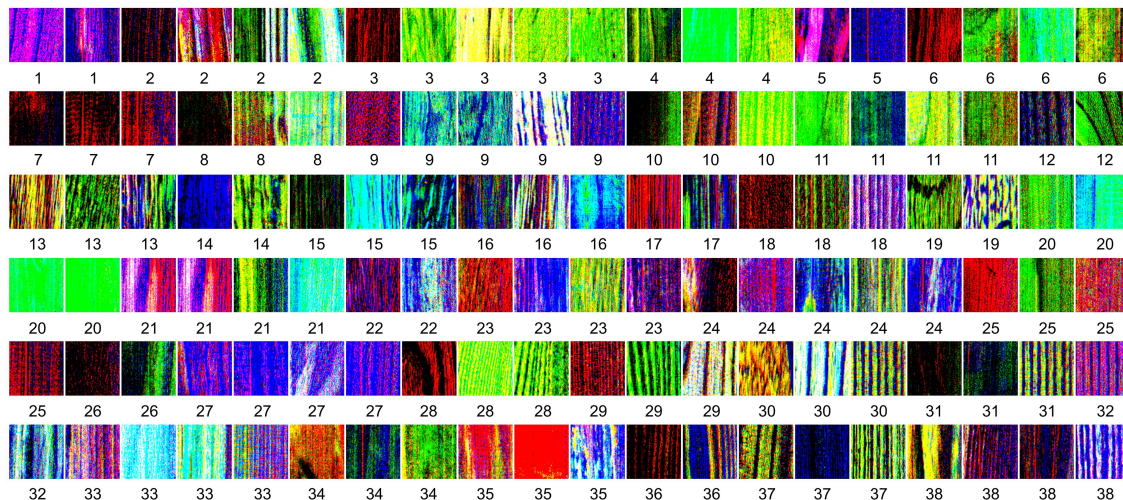

**b) PC1-PC2 raw patches (R: PC1, G: PC2)**

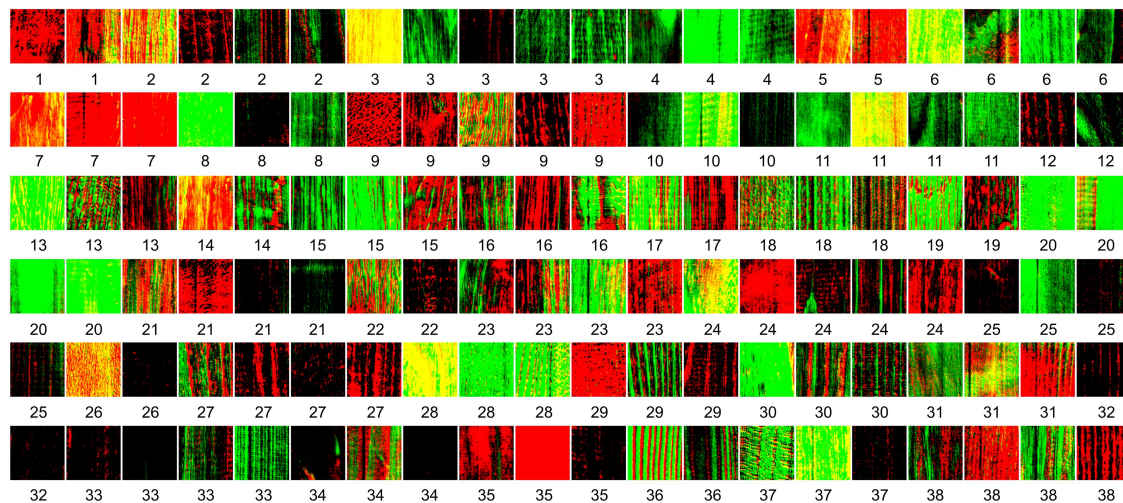

Supplement: c9an01180c1.pdf [file c9an01180c1.pdf]
